# Supplementary material for: Epigenetic promoter alterations in GI tumour immune-editing and resistance to immune checkpoint inhibition
Source: PubMed Central journal article supplement — Gut. 2021 Aug 25;71(7):1277–88. doi: 10.1136/gutjnl-2021-324420 (PMC9185816; doi:10.1136/gutjnl-2021-324420), 2021-08-25
Supplement: gutjnl-2021-324420supp002.pdf [file gutjnl-2021-324420supp002.pdf]

## Supplementary Tables 1 – 4

**Supplementary Table S1.** Clinical samples treated with ICI

| sample ID  | Treating Center        | Tumor Type     | Data type | ICI           |
|------------|------------------------|----------------|-----------|---------------|
| R_16_00151 | Samsung Medical Centre | Gastric Cancer | RNA-Seq   | Pembrolizumab |
| R_16_00152 | Samsung Medical Centre | Gastric Cancer | RNA-Seq   | Pembrolizumab |
| R_16_00153 | Samsung Medical Centre | Gastric Cancer | RNA-Seq   | Pembrolizumab |
| R_16_00154 | Samsung Medical Centre | Gastric Cancer | RNA-Seq   | Pembrolizumab |
| R_16_00382 | Samsung Medical Centre | Gastric Cancer | RNA-Seq   | Pembrolizumab |
| R_16_00383 | Samsung Medical Centre | Gastric Cancer | RNA-Seq   | Pembrolizumab |
| R_16_00384 | Samsung Medical Centre | Gastric Cancer | RNA-Seq   | Pembrolizumab |
| R_16_00385 | Samsung Medical Centre | Gastric Cancer | RNA-Seq   | Pembrolizumab |
| R_16_00386 | Samsung Medical Centre | Gastric Cancer | RNA-Seq   | Pembrolizumab |
| R_16_00442 | Samsung Medical Centre | Gastric Cancer | RNA-Seq   | Pembrolizumab |
| R_16_00387 | Samsung Medical Centre | Gastric Cancer | RNA-Seq   | Pembrolizumab |
| R_16_00389 | Samsung Medical Centre | Gastric Cancer | RNA-Seq   | Pembrolizumab |
| R_16_00390 | Samsung Medical Centre | Gastric Cancer | RNA-Seq   | Pembrolizumab |
| R_16_00391 | Samsung Medical Centre | Gastric Cancer | RNA-Seq   | Pembrolizumab |
| R_17_00819 | Samsung Medical Centre | Gastric Cancer | RNA-Seq   | Pembrolizumab |
| R_17_00011 | Samsung Medical Centre | Gastric Cancer | RNA-Seq   | Pembrolizumab |
| R_17_00012 | Samsung Medical Centre | Gastric Cancer | RNA-Seq   | Pembrolizumab |
| R_17_00013 | Samsung Medical Centre | Gastric Cancer | RNA-Seq   | Pembrolizumab |
| R_17_00015 | Samsung Medical Centre | Gastric Cancer | RNA-Seq   | Pembrolizumab |
| R_17_00016 | Samsung Medical Centre | Gastric Cancer | RNA-Seq   | Pembrolizumab |
| R_17_00017 | Samsung Medical Centre | Gastric Cancer | RNA-Seq   | Pembrolizumab |
| R_17_00018 | Samsung Medical Centre | Gastric Cancer | RNA-Seq   | Pembrolizumab |
| R_17_00019 | Samsung Medical Centre | Gastric Cancer | RNA-Seq   | Pembrolizumab |
| R_17_00020 | Samsung Medical Centre | Gastric Cancer | RNA-Seq   | Pembrolizumab |
| R_17_00290 | Samsung Medical Centre | Gastric Cancer | RNA-Seq   | Pembrolizumab |
| R_17_00022 | Samsung Medical Centre | Gastric Cancer | RNA-Seq   | Pembrolizumab |
| R_17_00023 | Samsung Medical Centre | Gastric Cancer | RNA-Seq   | Pembrolizumab |
| R_17_00029 | Samsung Medical Centre | Gastric Cancer | RNA-Seq   | Pembrolizumab |
| R_17_00031 | Samsung Medical Centre | Gastric Cancer | RNA-Seq   | Pembrolizumab |
| R_17_00032 | Samsung Medical Centre | Gastric Cancer | RNA-Seq   | Pembrolizumab |
| R_17_00033 | Samsung Medical Centre | Gastric Cancer | RNA-Seq   | Pembrolizumab |
| R_17_00036 | Samsung Medical Centre | Gastric Cancer | RNA-Seq   | Pembrolizumab |
| R_17_00035 | Samsung Medical Centre | Gastric Cancer | RNA-Seq   | Pembrolizumab |
| R_17_00037 | Samsung Medical Centre | Gastric Cancer | RNA-Seq   | Pembrolizumab |
| R_17_00038 | Samsung Medical Centre | Gastric Cancer | RNA-Seq   | Pembrolizumab |
| R_17_00394 | Samsung Medical Centre | Gastric Cancer | RNA-Seq   | Pembrolizumab |
| R_17_00393 | Samsung Medical Centre | Gastric Cancer | RNA-Seq   | Pembrolizumab |
| R_17_00396 | Samsung Medical Centre | Gastric Cancer | RNA-Seq   | Pembrolizumab |
| R_17_00397 | Samsung Medical Centre | Gastric Cancer | RNA-Seq   | Pembrolizumab |
| R_17_00395 | Samsung Medical Centre | Gastric Cancer | RNA-Seq   | Pembrolizumab |
| R_17_00398 | Samsung Medical Centre | Gastric Cancer | RNA-Seq   | Pembrolizumab |

Confidential

|            |                              |                          |         |                  |
|------------|------------------------------|--------------------------|---------|------------------|
| R_17_00400 | Samsung Medical Centre       | Gastric Cancer           | RNA-Seq | Pembrolizumab    |
| R_17_00401 | Samsung Medical Centre       | Gastric Cancer           | RNA-Seq | Pembrolizumab    |
| R_17_00402 | Samsung Medical Centre       | Gastric Cancer           | RNA-Seq | Pembrolizumab    |
| tdx702     | Roche                        | Gastric Cancer           | RNA-Seq | Atezolizumab     |
| tdx015     | Roche                        | Gastric Cancer           | RNA-Seq | Atezolizumab     |
| tdx1630    | Roche                        | Gastric Cancer           | RNA-Seq | Atezolizumab     |
| tdx3300    | Roche                        | Gastric Cancer           | RNA-Seq | Atezolizumab     |
| tdx4783    | Roche                        | Gastric Cancer           | RNA-Seq | Atezolizumab     |
| tdx6387    | Roche                        | Gastric Cancer           | RNA-Seq | Atezolizumab     |
| tdx1936    | Roche                        | Gastric Cancer           | RNA-Seq | Atezolizumab     |
| tdx2111    | Roche                        | Gastric Cancer           | RNA-Seq | Atezolizumab     |
| NUH004     | National University Hospital | Gastric Cancer           | RNA-Seq | Nivolumab + IMP* |
| S02        | Samsung Medical Centre       | Hepatocellular Carcinoma | RNA-Seq | Pembrolizumab    |
| S03        | Samsung Medical Centre       | Hepatocellular Carcinoma | RNA-Seq | Pembrolizumab    |
| S04        | Samsung Medical Centre       | Hepatocellular Carcinoma | RNA-Seq | Pembrolizumab    |
| S05        | Samsung Medical Centre       | Hepatocellular Carcinoma | RNA-Seq | Pembrolizumab    |
| S06        | Samsung Medical Centre       | Hepatocellular Carcinoma | RNA-Seq | Pembrolizumab    |
| S08        | Samsung Medical Centre       | Hepatocellular Carcinoma | RNA-Seq | Pembrolizumab    |
| S10        | Samsung Medical Centre       | Hepatocellular Carcinoma | RNA-Seq | Pembrolizumab    |
| S11        | Samsung Medical Centre       | Hepatocellular Carcinoma | RNA-Seq | Pembrolizumab    |
| S12        | Samsung Medical Centre       | Hepatocellular Carcinoma | RNA-Seq | Pembrolizumab    |
| S17        | Samsung Medical Centre       | Hepatocellular Carcinoma | RNA-Seq | Pembrolizumab    |
| S18        | Samsung Medical Centre       | Hepatocellular Carcinoma | RNA-Seq | Pembrolizumab    |
| S20        | Samsung Medical Centre       | Hepatocellular Carcinoma | RNA-Seq | Pembrolizumab    |
| S21        | Samsung Medical Centre       | Hepatocellular Carcinoma | RNA-Seq | Pembrolizumab    |
| S22        | Samsung Medical Centre       | Hepatocellular Carcinoma | RNA-Seq | Pembrolizumab    |
| S23        | Samsung Medical Centre       | Hepatocellular Carcinoma | RNA-Seq | Pembrolizumab    |
| S24        | Samsung Medical Centre       | Hepatocellular Carcinoma | RNA-Seq | Pembrolizumab    |
| S25        | Samsung Medical Centre       | Hepatocellular Carcinoma | RNA-Seq | Pembrolizumab    |
| S26        | Samsung Medical Centre       | Hepatocellular Carcinoma | RNA-Seq | Pembrolizumab    |
| S28        | Samsung Medical Centre       | Hepatocellular Carcinoma | RNA-Seq | Pembrolizumab    |
| S29        | Samsung Medical Centre       | Hepatocellular Carcinoma | RNA-Seq | Pembrolizumab    |
| S30        | Samsung Medical Centre       | Hepatocellular Carcinoma | RNA-Seq | Pembrolizumab    |
| S31        | Samsung Medical Centre       | Hepatocellular Carcinoma | RNA-Seq | Pembrolizumab    |
| S32        | Samsung Medical Centre       | Hepatocellular Carcinoma | RNA-Seq | Pembrolizumab    |
| S33        | Samsung Medical Centre       | Hepatocellular Carcinoma | RNA-Seq | Pembrolizumab    |
| S34        | Samsung Medical Centre       | Hepatocellular Carcinoma | RNA-Seq | Pembrolizumab    |
| S35        | Samsung Medical Centre       | Hepatocellular Carcinoma | RNA-Seq | Pembrolizumab    |
| S36        | Samsung Medical Centre       | Hepatocellular Carcinoma | RNA-Seq | Pembrolizumab    |
| S37        | Samsung Medical Centre       | Hepatocellular Carcinoma | RNA-Seq | Pembrolizumab    |
| S38        | Samsung Medical Centre       | Hepatocellular Carcinoma | RNA-Seq | Pembrolizumab    |
| S39        | Samsung Medical Centre       | Hepatocellular Carcinoma | RNA-Seq | Pembrolizumab    |
| S40        | Samsung Medical Centre       | Hepatocellular Carcinoma | RNA-Seq | Pembrolizumab    |
| S41        | Samsung Medical Centre       | Hepatocellular Carcinoma | RNA-Seq | Pembrolizumab    |
| S47        | Samsung Medical Centre       | Hepatocellular Carcinoma | RNA-Seq | Pembrolizumab    |
| S48        | Samsung Medical Centre       | Hepatocellular Carcinoma | RNA-Seq | Pembrolizumab    |

Confidential

|         |                        |                          |            |                  |
|---------|------------------------|--------------------------|------------|------------------|
| S49     | Samsung Medical Centre | Hepatocellular Carcinoma | RNA-Seq    | Pembrolizumab    |
| S50     | Samsung Medical Centre | Hepatocellular Carcinoma | RNA-Seq    | Pembrolizumab    |
| S51     | Samsung Medical Centre | Hepatocellular Carcinoma | RNA-Seq    | Pembrolizumab    |
| S52     | Samsung Medical Centre | Hepatocellular Carcinoma | RNA-Seq    | Pembrolizumab    |
| S53     | Samsung Medical Centre | Hepatocellular Carcinoma | RNA-Seq    | Pembrolizumab    |
| S54     | Samsung Medical Centre | Hepatocellular Carcinoma | RNA-Seq    | Pembrolizumab    |
| RHT5353 | National Cancer Centre | Hepatocellular Carcinoma | RNA-Seq    | Nivolumab + IMP  |
| RHT5355 | National Cancer Centre | Hepatocellular Carcinoma | RNA-Seq    | Nivolumab + IMP  |
| RHT5358 | National Cancer Centre | Hepatocellular Carcinoma | RNA-Seq    | Nivolumab + IMP  |
| RHT5359 | National Cancer Centre | Hepatocellular Carcinoma | RNA-Seq    | Nivolumab + IMP  |
| RHT5364 | National Cancer Centre | Hepatocellular Carcinoma | RNA-Seq    | Nivolumab + IMP  |
| RHT5370 | National Cancer Centre | Hepatocellular Carcinoma | RNA-Seq    | Nivolumab + IMP  |
| RHT5489 | National Cancer Centre | Hepatocellular Carcinoma | RNA-Seq    | Nivolumab + IMP  |
| RHT5491 | National Cancer Centre | Hepatocellular Carcinoma | RNA-Seq    | Nivolumab + IMP  |
| RHT5493 | National Cancer Centre | Hepatocellular Carcinoma | RNA-Seq    | Nivolumab + IMP  |
| RHT5495 | National Cancer Centre | Hepatocellular Carcinoma | RNA-Seq    | Nivolumab + IMP  |
| RHT5497 | National Cancer Centre | Hepatocellular Carcinoma | RNA-Seq    | Nivolumab + IMP  |
| RHT5499 | National Cancer Centre | Hepatocellular Carcinoma | RNA-Seq    | Nivolumab + IMP  |
| RHT5501 | National Cancer Centre | Hepatocellular Carcinoma | RNA-Seq    | Nivolumab + IMP  |
| RHT5503 | National Cancer Centre | Hepatocellular Carcinoma | RNA-Seq    | Nivolumab + IMP  |
| RHT5505 | National Cancer Centre | Hepatocellular Carcinoma | RNA-Seq    | Nivolumab + IMP  |
| RHT5507 | National Cancer Centre | Hepatocellular Carcinoma | RNA-Seq    | Nivolumab + IMP  |
| RHT5509 | National Cancer Centre | Hepatocellular Carcinoma | RNA-Seq    | Nivolumab + IMP  |
| RHT5923 | National Cancer Centre | Hepatocellular Carcinoma | RNA-Seq    | Nivolumab + IMP  |
| RHT5925 | National Cancer Centre | Hepatocellular Carcinoma | RNA-Seq    | Nivolumab + IMP  |
| RHT5927 | National Cancer Centre | Hepatocellular Carcinoma | RNA-Seq    | Nivolumab + IMP  |
| RHT5929 | National Cancer Centre | Hepatocellular Carcinoma | RNA-Seq    | Nivolumab + IMP  |
| RHT5931 | National Cancer Centre | Hepatocellular Carcinoma | RNA-Seq    | Nivolumab + IMP  |
| RHT5933 | National Cancer Centre | Hepatocellular Carcinoma | RNA-Seq    | Nivolumab + IMP  |
| RHT5936 | National Cancer Centre | Hepatocellular Carcinoma | RNA-Seq    | Nivolumab + IMP  |
| RHT5937 | National Cancer Centre | Hepatocellular Carcinoma | RNA-Seq    | Nivolumab + IMP  |
| RHT5938 | National Cancer Centre | Hepatocellular Carcinoma | RNA-Seq    | Nivolumab + IMP  |
| RHT5939 | National Cancer Centre | Hepatocellular Carcinoma | RNA-Seq    | Nivolumab + IMP  |
| RHT5940 | National Cancer Centre | Hepatocellular Carcinoma | RNA-Seq    | Nivolumab + IMP  |
| J02     | National Cancer Centre | Hepatocellular Carcinoma | NanoString | Nivolumab        |
| J04     | National Cancer Centre | Hepatocellular Carcinoma | NanoString | Nivolumab + IMP  |
| J05     | National Cancer Centre | Hepatocellular Carcinoma | NanoString | Nivolumab        |
| J08     | National Cancer Centre | Hepatocellular Carcinoma | NanoString | Nivolumab        |
| J09     | National Cancer Centre | Hepatocellular Carcinoma | NanoString | Nivolumab        |
| J10     | National Cancer Centre | Hepatocellular Carcinoma | NanoString | Durvalumab + IMP |
| J12     | National Cancer Centre | Hepatocellular Carcinoma | NanoString | Nivolumab        |
| J13     | National Cancer Centre | Hepatocellular Carcinoma | NanoString | Nivolumab        |
| M01     | University of Milan    | Anal Squamous Cancer     | NanoString | Avelumab         |
| M03     | University of Milan    | Gastric Cancer           | NanoString | Nivolumab + IMP  |
| M04     | University of Milan    | Gastric Cancer           | NanoString | Ipilimumab       |
| M06     | University of Milan    | Gastric Cancer           | NanoString | Nivolumab + IMP  |

Confidential

|        |                     |                            |            |                 |
|--------|---------------------|----------------------------|------------|-----------------|
| M07    | University of Milan | Gastric Cancer             | NanoString | Nivolumab + IMP |
| M10    | University of Milan | Gastric Cancer             | NanoString | Nivolumab + IMP |
| M11    | University of Milan | Gastric Cancer             | NanoString | Pembrolizumab   |
| M12    | University of Milan | Gastric Cancer             | NanoString | Pembrolizumab   |
| M13    | University of Milan | Cholangiocarcinoma         | NanoString | Pembrolizumab   |
| M14    | University of Milan | Colorectal Cancer          | NanoString | Novel PD-1      |
| M15    | University of Milan | Anal Squamous Cancer       | NanoString | Avelumab        |
| M16    | University of Milan | Anal Squamous Cancer       | NanoString | Avelumab        |
| M17    | University of Milan | Anal Squamous Cancer       | NanoString | Avelumab + IMP  |
| M18    | University of Milan | Anal Squamous Cancer       | NanoString | Avelumab + IMP  |
| M19    | University of Milan | Anal Squamous Cancer       | NanoString | Avelumab        |
| M22    | University of Milan | Anal Squamous Cancer       | NanoString | Avelumab        |
| M23    | University of Milan | Esophageal Squamous Cancer | NanoString | Nivolumab + IMP |
| M24    | University of Milan | Esophageal Squamous Cancer | NanoString | Nivolumab + IMP |
| M25    | University of Milan | Anal Squamous Cancer       | NanoString | Avelumab        |
| M26    | University of Milan | Anal Squamous Cancer       | NanoString | Avelumab        |
| M27    | University of Milan | Anal Squamous Cancer       | NanoString | Avelumab        |
| M28    | University of Milan | Anal Squamous Cancer       | NanoString | Avelumab        |
| M29    | University of Milan | Esophageal Squamous Cancer | NanoString | Nivolumab       |
| M30    | University of Milan | Anal Squamous Cancer       | NanoString | Avelumab        |
| M31    | University of Milan | Esophageal Squamous Cancer | NanoString | Nivolumab + IMP |
| M33    | University of Milan | Anal Squamous Cancer       | NanoString | Avelumab + IMP  |
| M34    | University of Milan | Anal Squamous Cancer       | NanoString | Avelumab + IMP  |
| ACC_10 | Aichi Cancer Center | Gastric Cancer             | NanoString | Nivolumab       |
| ACC_11 | Aichi Cancer Center | Gastric Cancer             | NanoString | Nivolumab       |
| ACC_12 | Aichi Cancer Center | Gastric Cancer             | NanoString | Nivolumab       |
| ACC_13 | Aichi Cancer Center | Gastric Cancer             | NanoString | Nivolumab       |
| ACC_14 | Aichi Cancer Center | Gastric Cancer             | NanoString | Nivolumab       |
| ACC_15 | Aichi Cancer Center | Gastric Cancer             | NanoString | Nivolumab       |
| ACC_16 | Aichi Cancer Center | Gastric Cancer             | NanoString | Nivolumab       |
| ACC_17 | Aichi Cancer Center | Gastric Cancer             | NanoString | Nivolumab       |
| ACC_18 | Aichi Cancer Center | Gastric Cancer             | NanoString | Nivolumab       |
| ACC_2  | Aichi Cancer Center | Gastric Cancer             | NanoString | Nivolumab       |
| ACC_20 | Aichi Cancer Center | Gastric Cancer             | NanoString | Nivolumab       |
| ACC_21 | Aichi Cancer Center | Gastric Cancer             | NanoString | Nivolumab       |
| ACC_22 | Aichi Cancer Center | Gastric Cancer             | NanoString | Nivolumab       |
| ACC_24 | Aichi Cancer Center | Gastric Cancer             | NanoString | Nivolumab       |
| ACC_25 | Aichi Cancer Center | Gastric Cancer             | NanoString | Nivolumab       |
| ACC_26 | Aichi Cancer Center | Gastric Cancer             | NanoString | Nivolumab       |
| ACC_27 | Aichi Cancer Center | Gastric Cancer             | NanoString | Nivolumab       |
| ACC_28 | Aichi Cancer Center | Gastric Cancer             | NanoString | Nivolumab       |
| ACC_29 | Aichi Cancer Center | Gastric Cancer             | NanoString | Nivolumab       |
| ACC_30 | Aichi Cancer Center | Gastric Cancer             | NanoString | Nivolumab       |
| ACC_31 | Aichi Cancer Center | Gastric Cancer             | NanoString | Nivolumab       |
| ACC_32 | Aichi Cancer Center | Gastric Cancer             | NanoString | Nivolumab       |
| ACC_33 | Aichi Cancer Center | Gastric Cancer             | NanoString | Nivolumab       |

Confidential

|             |                        |                |            |                     |
|-------------|------------------------|----------------|------------|---------------------|
| ACC_34      | Aichi Cancer Center    | Gastric Cancer | NanoString | Nivolumab           |
| ACC_35      | Aichi Cancer Center    | Gastric Cancer | NanoString | Nivolumab           |
| ACC_36      | Aichi Cancer Center    | Gastric Cancer | NanoString | Nivolumab           |
| ACC_37      | Aichi Cancer Center    | Gastric Cancer | NanoString | Nivolumab           |
| ACC_38      | Aichi Cancer Center    | Gastric Cancer | NanoString | Nivolumab           |
| ACC_39      | Aichi Cancer Center    | Gastric Cancer | NanoString | Nivolumab           |
| ACC_4       | Aichi Cancer Center    | Gastric Cancer | NanoString | Nivolumab           |
| ACC_40      | Aichi Cancer Center    | Gastric Cancer | NanoString | Nivolumab           |
| ACC_41      | Aichi Cancer Center    | Gastric Cancer | NanoString | Nivolumab           |
| ACC_42      | Aichi Cancer Center    | Gastric Cancer | NanoString | Nivolumab           |
| ACC_43      | Aichi Cancer Center    | Gastric Cancer | NanoString | Nivolumab           |
| ACC_44      | Aichi Cancer Center    | Gastric Cancer | NanoString | Nivolumab           |
| ACC_46      | Aichi Cancer Center    | Gastric Cancer | NanoString | Nivolumab           |
| ACC_47      | Aichi Cancer Center    | Gastric Cancer | NanoString | Nivolumab           |
| ACC_48      | Aichi Cancer Center    | Gastric Cancer | NanoString | Nivolumab           |
| ACC_49      | Aichi Cancer Center    | Gastric Cancer | NanoString | Nivolumab           |
| ACC_5       | Aichi Cancer Center    | Gastric Cancer | NanoString | Nivolumab           |
| ACC_6       | Aichi Cancer Center    | Gastric Cancer | NanoString | Nivolumab           |
| ACC_7       | Aichi Cancer Center    | Gastric Cancer | NanoString | Nivolumab           |
| ACC_8       | Aichi Cancer Center    | Gastric Cancer | NanoString | Nivolumab           |
| ACC_9       | Aichi Cancer Center    | Gastric Cancer | NanoString | Nivolumab           |
| mGC_INT31   | University of Milan    | Gastric Cancer | NanoString | Pembrolizumab       |
| mGC_INT32   | University of Milan    | Gastric Cancer | NanoString | Pembrolizumab       |
| mGC_INT33   | University of Milan    | Gastric Cancer | NanoString | Pembrolizumab       |
| mGC_INT34_1 | University of Milan    | Gastric Cancer | NanoString | Pembrolizumab       |
| mGC_INT35   | University of Milan    | Gastric Cancer | NanoString | Pembrolizumab       |
| mGC_INT36   | University of Milan    | Gastric Cancer | NanoString | Nivolumab           |
| YCC.S07     | Yonsei Cancer Centre   | Gastric Cancer | NanoString | Nivolumab + IMP     |
| YCC.S11     | Yonsei Cancer Centre   | Gastric Cancer | NanoString | Novel PD-1          |
| YCC.S16     | Yonsei Cancer Centre   | Gastric Cancer | NanoString | Pembrolizumab + IMP |
| RAM-E01     | Samsung Medical Centre | Gastric Cancer | RNA-Seq    | Pac + Ram*          |
| RAM-E02     | Samsung Medical Centre | Gastric Cancer | RNA-Seq    | Pac + Ram           |
| RAM-E04     | Samsung Medical Centre | Gastric Cancer | RNA-Seq    | Pac + Ram           |
| RAM-E05     | Samsung Medical Centre | Gastric Cancer | RNA-Seq    | Pac + Ram           |
| RAM-E06     | Samsung Medical Centre | Gastric Cancer | RNA-Seq    | Pac + Ram           |
| RAM-E07     | Samsung Medical Centre | Gastric Cancer | RNA-Seq    | Pac + Ram           |
| RAM-E08     | Samsung Medical Centre | Gastric Cancer | RNA-Seq    | Pac + Ram           |
| RAM-E10     | Samsung Medical Centre | Gastric Cancer | RNA-Seq    | Pac + Ram           |
| RAM-E11     | Samsung Medical Centre | Gastric Cancer | RNA-Seq    | Pac + Ram           |
| RAM-E12     | Samsung Medical Centre | Gastric Cancer | RNA-Seq    | Pac + Ram           |
| RAM-E13     | Samsung Medical Centre | Gastric Cancer | RNA-Seq    | Pac + Ram           |
| RAM-E15     | Samsung Medical Centre | Gastric Cancer | RNA-Seq    | Pac + Ram           |
| RAM-E16     | Samsung Medical Centre | Gastric Cancer | RNA-Seq    | Pac + Ram           |
| RAM-E17     | Samsung Medical Centre | Gastric Cancer | RNA-Seq    | Pac + Ram           |
| RAM-E19     | Samsung Medical Centre | Gastric Cancer | RNA-Seq    | Pac + Ram           |
| RAM-E20     | Samsung Medical Centre | Gastric Cancer | RNA-Seq    | Pac + Ram           |

Confidential



|         |                              |                |         |                    |
|---------|------------------------------|----------------|---------|--------------------|
| RAM-E21 | Samsung Medical Centre       | Gastric Cancer | RNA-Seq | Pac + Ram          |
| RAM-E22 | Samsung Medical Centre       | Gastric Cancer | RNA-Seq | Pac + Ram          |
| RAM-E23 | Samsung Medical Centre       | Gastric Cancer | RNA-Seq | Pac + Ram          |
| RAM-E24 | Samsung Medical Centre       | Gastric Cancer | RNA-Seq | Pac + Ram          |
| RAM-E25 | Samsung Medical Centre       | Gastric Cancer | RNA-Seq | Pac + Ram          |
| RAM-E26 | Samsung Medical Centre       | Gastric Cancer | RNA-Seq | Pac + Ram          |
| RAM-E28 | Samsung Medical Centre       | Gastric Cancer | RNA-Seq | Pac + Ram          |
| RAM-E29 | Samsung Medical Centre       | Gastric Cancer | RNA-Seq | Pac + Ram          |
| RAM-E30 | Samsung Medical Centre       | Gastric Cancer | RNA-Seq | Pac + Ram          |
| RAM-E31 | Samsung Medical Centre       | Gastric Cancer | RNA-Seq | Pac + Ram          |
| RAM-E32 | Samsung Medical Centre       | Gastric Cancer | RNA-Seq | Pac + Ram          |
| RAM-E33 | Samsung Medical Centre       | Gastric Cancer | RNA-Seq | Pac + Ram          |
| RAM-E35 | Samsung Medical Centre       | Gastric Cancer | RNA-Seq | Pac + Ram          |
| RAM-E37 | Samsung Medical Centre       | Gastric Cancer | RNA-Seq | Pac + Ram          |
| RAM-E39 | Samsung Medical Centre       | Gastric Cancer | RNA-Seq | Pac + Ram          |
| RAM-E41 | Samsung Medical Centre       | Gastric Cancer | RNA-Seq | Pac + Ram          |
| RAM-E42 | Samsung Medical Centre       | Gastric Cancer | RNA-Seq | Pac + Ram          |
| RAM-E43 | Samsung Medical Centre       | Gastric Cancer | RNA-Seq | Pac + Ram          |
| RAM-E44 | Samsung Medical Centre       | Gastric Cancer | RNA-Seq | Pac + Ram          |
| RAM-E45 | Samsung Medical Centre       | Gastric Cancer | RNA-Seq | Pac + Ram          |
| RAM-E46 | Samsung Medical Centre       | Gastric Cancer | RNA-Seq | Pac + Ram          |
| RAM-E47 | Samsung Medical Centre       | Gastric Cancer | RNA-Seq | Pac + Ram          |
| RAM-E49 | Samsung Medical Centre       | Gastric Cancer | RNA-Seq | Pac + Ram          |
| RAM-E50 | Samsung Medical Centre       | Gastric Cancer | RNA-Seq | Pac + Ram          |
| RAM-E51 | Samsung Medical Centre       | Gastric Cancer | RNA-Seq | Pac + Ram          |
| RAM-E53 | Samsung Medical Centre       | Gastric Cancer | RNA-Seq | Pac + Ram          |
| RAM-E55 | Samsung Medical Centre       | Gastric Cancer | RNA-Seq | Pac + Ram          |
| RAM-E56 | Samsung Medical Centre       | Gastric Cancer | RNA-Seq | Pac + Ram          |
| RAM-E57 | Samsung Medical Centre       | Gastric Cancer | RNA-Seq | Pac + Ram          |
| RAM-E58 | Samsung Medical Centre       | Gastric Cancer | RNA-Seq | Pac + Ram          |
| RAM-E59 | Samsung Medical Centre       | Gastric Cancer | RNA-Seq | Pac + Ram          |
| NCC026  | National Cancer Centre       | Gastric Cancer | RNA-Seq | SOX(Chemotherapy)* |
| S-011   | Yonsei Cancer Centre         | Gastric Cancer | RNA-Seq | SOX (Chemotherapy) |
| S-021   | Yonsei Cancer Centre         | Gastric Cancer | RNA-Seq | SOX (Chemotherapy) |
| NUH009  | National University Hospital | Gastric Cancer | RNA-Seq | SOX (Chemotherapy) |
| NCC018  | National Cancer Centre       | Gastric Cancer | RNA-Seq | SOX (Chemotherapy) |
| S-038   | Yonsei Cancer Centre         | Gastric Cancer | RNA-Seq | SP (Chemotherapy)* |
| S-008   | Yonsei Cancer Centre         | Gastric Cancer | RNA-Seq | SOX (Chemotherapy) |
| NUH014  | National University Hospital | Gastric Cancer | RNA-Seq | SOX (Chemotherapy) |
| NCC022  | National Cancer Centre       | Gastric Cancer | RNA-Seq | SOX (Chemotherapy) |
| S-072   | Yonsei Cancer Centre         | Gastric Cancer | RNA-Seq | SOX (Chemotherapy) |
| S-036   | Yonsei Cancer Centre         | Gastric Cancer | RNA-Seq | SP (Chemotherapy)  |
| S-035   | Yonsei Cancer Centre         | Gastric Cancer | RNA-Seq | SP (Chemotherapy)  |
| NUH006  | National University Hospital | Gastric Cancer | RNA-Seq | SOX (Chemotherapy) |
| S-044   | Yonsei Cancer Centre         | Gastric Cancer | RNA-Seq | SP (Chemotherapy)  |
| S-071   | Yonsei Cancer Centre         | Gastric Cancer | RNA-Seq | SP (Chemotherapy)  |

Confidential

|        |                              |                |         |                    |
|--------|------------------------------|----------------|---------|--------------------|
| S-074  | Yonsei Cancer Centre         | Gastric Cancer | RNA-Seq | SOX (Chemotherapy) |
| NUH008 | National University Hospital | Gastric Cancer | RNA-Seq | SOX (Chemotherapy) |
| S-012  | Yonsei Cancer Centre         | Gastric Cancer | RNA-Seq | SOX (Chemotherapy) |
| S-063  | Yonsei Cancer Centre         | Gastric Cancer | RNA-Seq | SP (Chemotherapy)  |
| S-047  | Yonsei Cancer Centre         | Gastric Cancer | RNA-Seq | SP (Chemotherapy)  |
| NUH020 | National University Hospital | Gastric Cancer | RNA-Seq | SOX (Chemotherapy) |
| S-003  | Yonsei Cancer Centre         | Gastric Cancer | RNA-Seq | SOX (Chemotherapy) |
| S-005  | Yonsei Cancer Centre         | Gastric Cancer | RNA-Seq | SP (Chemotherapy)  |
| NUH012 | National University Hospital | Gastric Cancer | RNA-Seq | SOX (Chemotherapy) |
| NCC025 | National Cancer Centre       | Gastric Cancer | RNA-Seq | SOX (Chemotherapy) |
| S-037  | Yonsei Cancer Centre         | Gastric Cancer | RNA-Seq | SP (Chemotherapy)  |
| S-041  | Yonsei Cancer Centre         | Gastric Cancer | RNA-Seq | SOX (Chemotherapy) |
| S-007  | Yonsei Cancer Centre         | Gastric Cancer | RNA-Seq | SOX (Chemotherapy) |
| S-015  | Yonsei Cancer Centre         | Gastric Cancer | RNA-Seq | SP (Chemotherapy)  |
| NUH017 | National University Hospital | Gastric Cancer | RNA-Seq | SOX (Chemotherapy) |
| NUH010 | National University Hospital | Gastric Cancer | RNA-Seq | SOX (Chemotherapy) |
| NUH019 | National University Hospital | Gastric Cancer | RNA-Seq | SOX (Chemotherapy) |
| S-065  | Yonsei Cancer Centre         | Gastric Cancer | RNA-Seq | SP (Chemotherapy)  |
| S-046  | Yonsei Cancer Centre         | Gastric Cancer | RNA-Seq | SP (Chemotherapy)  |
| NCC003 | National Cancer Centre       | Gastric Cancer | RNA-Seq | SOX (Chemotherapy) |
| S-048  | Yonsei Cancer Centre         | Gastric Cancer | RNA-Seq | SP (Chemotherapy)  |
| S-004  | Yonsei Cancer Centre         | Gastric Cancer | RNA-Seq | SOX (Chemotherapy) |
| S-031  | Yonsei Cancer Centre         | Gastric Cancer | RNA-Seq | SP (Chemotherapy)  |
| NCC020 | National Cancer Centre       | Gastric Cancer | RNA-Seq | SP (Chemotherapy)  |
| S-030  | Yonsei Cancer Centre         | Gastric Cancer | RNA-Seq | SOX (Chemotherapy) |
| NUH016 | National University Hospital | Gastric Cancer | RNA-Seq | SP (Chemotherapy)  |
| S-024  | Yonsei Cancer Centre         | Gastric Cancer | RNA-Seq | SP (Chemotherapy)  |
| NUH003 | National University Hospital | Gastric Cancer | RNA-Seq | SOX (Chemotherapy) |
| NUH027 | National University Hospital | Gastric Cancer | RNA-Seq | SP (Chemotherapy)  |
| S-027  | Yonsei Cancer Centre         | Gastric Cancer | RNA-Seq | SOX (Chemotherapy) |
| NCC021 | National Cancer Centre       | Gastric Cancer | RNA-Seq | SP (Chemotherapy)  |
| NCC014 | National Cancer Centre       | Gastric Cancer | RNA-Seq | SOX (Chemotherapy) |
| S-050  | Yonsei Cancer Centre         | Gastric Cancer | RNA-Seq | SP (Chemotherapy)  |
| NCC010 | National Cancer Centre       | Gastric Cancer | RNA-Seq | SOX (Chemotherapy) |
| NUH004 | National University Hospital | Gastric Cancer | RNA-Seq | SOX (Chemotherapy) |
| NUH021 | National University Hospital | Gastric Cancer | RNA-Seq | SOX (Chemotherapy) |
| S-042  | Yonsei Cancer Centre         | Gastric Cancer | RNA-Seq | SP (Chemotherapy)  |
| NUH005 | National University Hospital | Gastric Cancer | RNA-Seq | SP (Chemotherapy)  |
| S-034  | Yonsei Cancer Centre         | Gastric Cancer | RNA-Seq | SP (Chemotherapy)  |
| NCC001 | National Cancer Centre       | Gastric Cancer | RNA-Seq | SOX (Chemotherapy) |
| S-006  | Yonsei Cancer Centre         | Gastric Cancer | RNA-Seq | SP (Chemotherapy)  |
| S-078  | Yonsei Cancer Centre         | Gastric Cancer | RNA-Seq | SP (Chemotherapy)  |
| NUH002 | National University Hospital | Gastric Cancer | RNA-Seq | SOX (Chemotherapy) |
| S-045  | Yonsei Cancer Centre         | Gastric Cancer | RNA-Seq | SP (Chemotherapy)  |
| S-075  | Yonsei Cancer Centre         | Gastric Cancer | RNA-Seq | SP (Chemotherapy)  |

IMP = investigational medicinal product; Pac + Ram = paclitaxel + ramucirumab; SOX = S-1 + oxaliplatin, SP = S-1 + cisplatin

Confidential

**Supplementary Table S2.** Clinical and histopathological characteristics of samples included for single-cell RNA-Seq

| Sample ID     | Stage | TNM  | APB Group | No. of Cells | Lauren     | WHO Classification          | Histological Grade                  | Tumor location      | Linitis Plastica | TCGA subtype | Known Driver Mutation | Known Driver Amplification |
|---------------|-------|------|-----------|--------------|------------|-----------------------------|-------------------------------------|---------------------|------------------|--------------|-----------------------|----------------------------|
| GCSCRNASEQ508 | IIIC  | T4N3 | int       | 7380         | Intestinal | Tubular carcinoma           | Moderately differentiated           | gastric cardia      | No               | GS           | TP53, FBXW7           | CCNE1                      |
| GCSCRNASEQ502 | IIIC  | T4N3 | high      | 7276         | Intestinal | Tubular carcinoma           | Moderately differentiated           | gastric cardia      | No               | GS           | TP53, PIK3CA          |                            |
| GCSCRNASEQ511 | IIB   | T3N1 | low       | 13626        | Intestinal | Tubular carcinoma           | Moderate to poorly differentiated   | gastric antrum      | No               | MSI          | PIK3CA, CDKN2A        | CCND1                      |
| GCSCRNASEQ498 | IIA   | T3N0 | high      | 6859         | Intestinal | Tubular carcinoma           | Moderately to poorly differentiated | gastric antrum      | No               | GS           |                       |                            |
| GCSCRNASEQ512 | IIIA  | T3N2 | high      | 2681         | Intestinal | Tubular carcinoma           | Well differentiated                 | Gastric antrum      | No               | CIN          |                       |                            |
| GCSCRNASEQ514 | IIIB  | T4N3 | int       | 2597         | Diffuse    | Poorly cohesive             | NA                                  | Gastric body/antrum | No               |              |                       |                            |
| GCSCRNASEQ518 | IIA   | T3N0 | low       | 2769         | mixed      | tubular and poorly cohesive | Poorly differentiated               | Gastric antrum      | No               | MSI          | KRAS,TP53             | JAK2/CD274                 |
| GCSCRNASEQ519 | IIIC  | T4N3 | low       | 3525         | Diffuse    | Poorly cohesive             | Poorly differentiated               |                     | yes              | CIN          | TP53, ERBB2,          |                            |
| GCSCRNASEQ521 | IIA   | T3N0 | int       | 2097         | Intestinal | Tubular                     | Moderately differentiated           | Gastric antrum      | No               | GS           | TP53                  |                            |
| GCSCRNASEQ522 | IIB   | T1N3 | int       | 3593         | Intestinal | Tubular                     | Poorly differentiated               | Gastric body/antrum | No               | GS           | TP53                  |                            |
| GCSCRNASEQ525 | IIB   | T2N2 | int       | 2668         | mixed      | Mixed                       | Poorly differentiated               | Gastric antrum      | No               | CIN          | TP53                  | KRAS,GATA4                 |

Confidential



**Supplementary Table S3.** Tumor microenvironment cellular composition based on APB group.

| Cell Type        | APB <sub>low</sub> |       | APB <sub>int</sub> |       | APB <sub>high</sub> |       | p-val*  |
|------------------|--------------------|-------|--------------------|-------|---------------------|-------|---------|
|                  | (%)                | n     | (%)                | n     | (%)                 | n     |         |
| T-cells          | 42                 | 8307  | 24                 | 4390  | 36                  | 6132  | <0.0001 |
| Epithelial cells | 13                 | 2689  | 21                 | 3919  | 20                  | 3329  | <0.0001 |
| B-cells          | 14                 | 2771  | 12                 | 2222  | 16                  | 2694  | 0.82    |
| Macrophage       | 10                 | 2082  | 18                 | 3210  | 5                   | 740   | 0.0045  |
| Endothelial      | 4                  | 761   | 2                  | 411   | 3                   | 537   | <0.0001 |
| Fibroblast       | 5                  | 1014  | 15                 | 2816  | 8                   | 1396  | <0.0001 |
| Others           | 12                 | 2296  | 8                  | 1367  | 12                  | 1988  | <0.0001 |
| Total            | 100                | 19920 | 100                | 18335 | 100                 | 16816 |         |

Fisher-exact test p-value of APB<sub>low</sub> vs APB<sub>int</sub>/APB<sub>high</sub>

Confidential

**Supplementary Table S4.** Details of gastric cancer cell lines used in humanized-mouse experiment

| Cell Line | Source                                       | Culture medium                               | Anchorage Properties |
|-----------|----------------------------------------------|----------------------------------------------|----------------------|
| SNU1750   | Korean Cell Line Bank                        | RPMI 1640 + 10% FBS + 1% Pen Strep + 1% NEAA | Adherent             |
| GSU       | Riken Gene Bank                              | RPMI 1640 + 10% FBS + 1% Pen Strep + 1% NEAA | Adherent             |
| SNU16     | American Type Culture Collection (ATCC)      | RPMI 1640 + 10% FBS + 1% Pen Strep + 1% NEAA | Suspension           |
| YCC21     | Yonsei University College of Medicine, Seoul | MEM + 10% FBS + 1% Pen Strep + 1% NEAA       | Adherent             |
| NCC59     | Korean Cell Line Bank                        | RPMI 1640 + 10% FBS + 1% Pen Strep + 1% NEAA | Semi-adherent        |

Confidential

**Supplementary Table S5.** Gastric cancer immunotherapy treated cohort patient characteristics

|                                                   | Total n = 53                   | n (%)                |
|---------------------------------------------------|--------------------------------|----------------------|
| <b>Age</b> (median, years)                        |                                | 57, range (26 to 78) |
| <b>Gender</b>                                     | Male                           | 40 (75%)             |
|                                                   | Female                         | 13 (25%)             |
| <b>Histological Grade*</b>                        | Well/moderately differentiated | 13 (24%)             |
|                                                   | Poorly differentiated          | 22 (42%)             |
|                                                   | Signet ring/others             | 18 (34%)             |
| <b>TCGA subtype*</b>                              | MSI                            | 5 (9%)               |
|                                                   | EBV                            | 4 (8%)               |
|                                                   | CIN                            | 15 (28%)             |
|                                                   | GS                             | 20 (38%)             |
| <b>PD-L1 Immunohistochemistry*</b><br>(CPS score) | 0                              | 18 (34%)             |
|                                                   | 1 – 9                          | 13 (25%)             |
|                                                   | 10 and higher                  | 9 (17%)              |

\* data not available for all samples

Confidential

**Supplementary Table S6.** Comparison of *CD8A*, *GZMA* and *PRF1* gene expression between APB<sub>high</sub> and APB<sub>low</sub> by tumor type (Wilcoxon rank-sum test p values listed).

| Tumor Type | n    | CD8A      | GZMA      | PRF1      |
|------------|------|-----------|-----------|-----------|
| ACC        | 79   | 0.4415    | 0.4521    | 0.1105    |
| BLCA       | 411  | 8.75E-07  | 0.0001015 | 1.29E-05  |
| BRCA       | 1114 | 2.20E-16  | 1.61E-12  | 3.60E-13  |
| CESC       | 306  | 0.02412   | 0.3701    | 0.002608  |
| CHOL       | 36   | 0.1383    | 0.2707    | 0.1852    |
| Colorectal | 640  | 1.07E-13  | 2.87E-09  | 2.87E-09  |
| ESCA       | 185  | 3.35E-05  | 0.0002458 | 0.0001687 |
| Glioma     | 701  | 8.49E-05  | 2.20E-16  | 2.20E-16  |
| HNSC       | 504  | 2.61E-09  | 0.01079   | 2.39E-07  |
| Kidney     | 895  | 2.20E-16  | 2.20E-16  | 2.20E-16  |
| LIHC       | 374  | 0.025     | 0.9693    | 0.4908    |
| LUAD       | 530  | 0.003628  | 0.09362   | 3.81E-05  |
| LUSC       | 501  | 2.85E-09  | 2.72E-06  | 4.40E-12  |
| MESO       | 87   | 0.0003025 | 0.04914   | 0.003159  |
| OV         | 430  | 5.16E-08  | 3.69E-11  | 2.44E-14  |
| PAAD       | 179  | 0.001276  | 0.07577   | 0.04434   |
| PCPG       | 184  | 0.05846   | 0.02063   | 5.16E-06  |
| PRAD       | 502  | 8.09E-06  | 0.04175   | 3.63E-05  |
| SARC       | 263  | 5.13E-05  | 0.0102    | 6.57E-06  |
| SKCM       | 472  | 2.20E-16  | 2.20E-16  | 2.20E-16  |
| STAD       | 416  | 0.00028   | 3.88E-06  | 3.08E-06  |
| TGCT       | 156  | 0.0003038 | 0.222     | 4.87E-05  |
| THCA       | 513  | 8.95E-07  | 3.00E-04  | 1.26E-05  |
| UCEC       | 550  | 0.001857  | 0.09517   | 6.32E-07  |
| UCS        | 57   | 0.03452   | 0.04693   | 0.02781   |
| UVM        | 80   | 0.06667   | 0.2302    | 0.4255    |

Confidential
