# Supplementary material for: Epigenetic promoter alterations in GI tumour immune-editing and resistance to immune checkpoint inhibition
Source: PubMed Central journal article supplement — Gut. 2021 Aug 25;71(7):1277–88. doi: 10.1136/gutjnl-2021-324420 (PMC9185816; doi:10.1136/gutjnl-2021-324420), 2021-08-25
Supplement: gutjnl-2021-324420supp003.pdf [file gutjnl-2021-324420supp003.pdf]

## Supplementary Figure 1

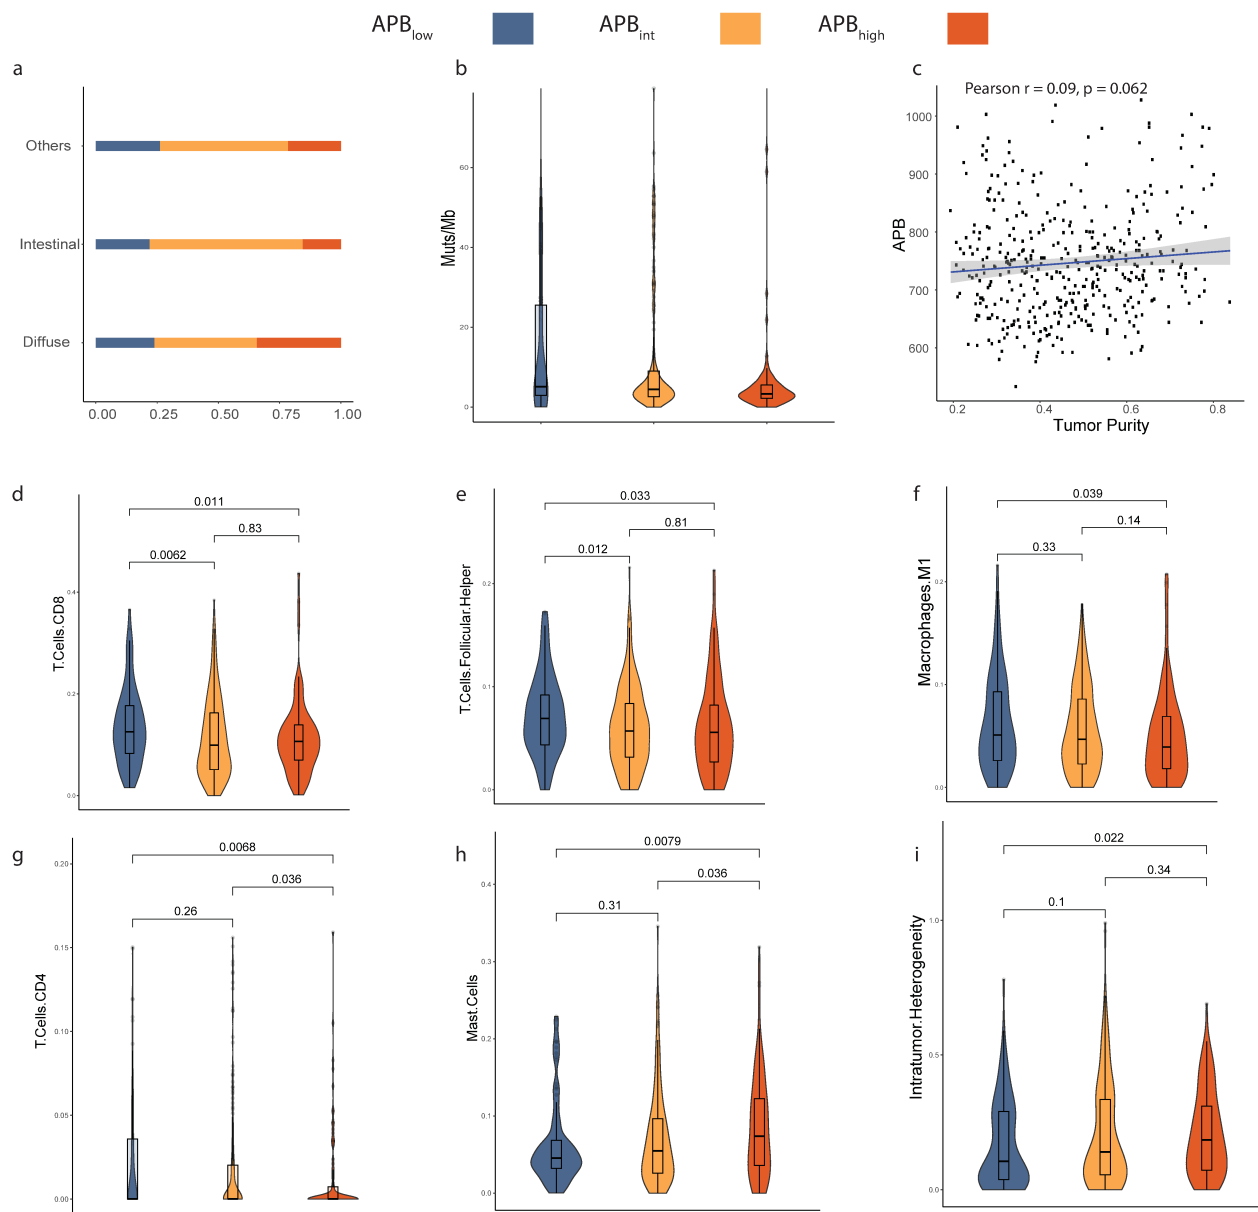

## Supplementary Figure 2

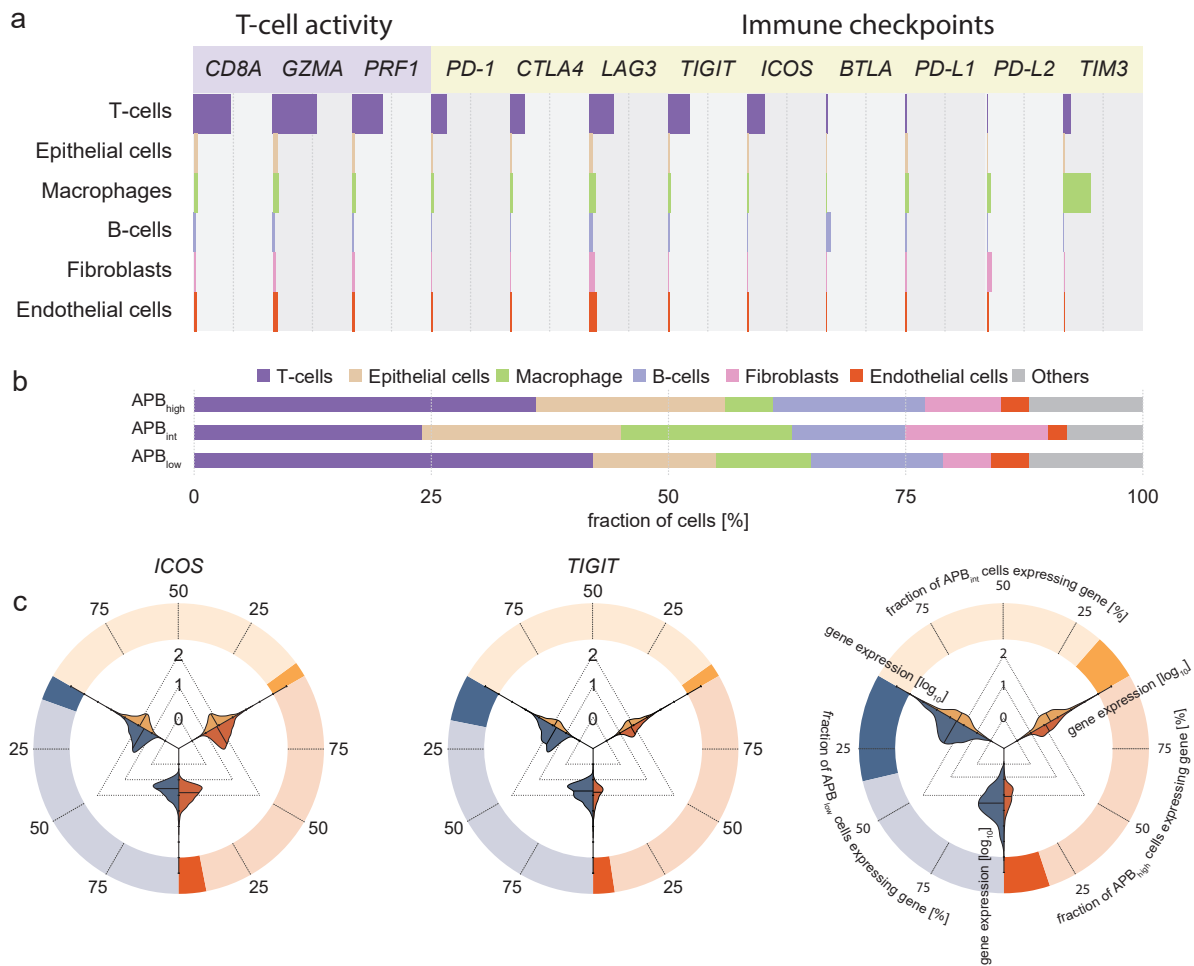

## Supplementary Figure 3

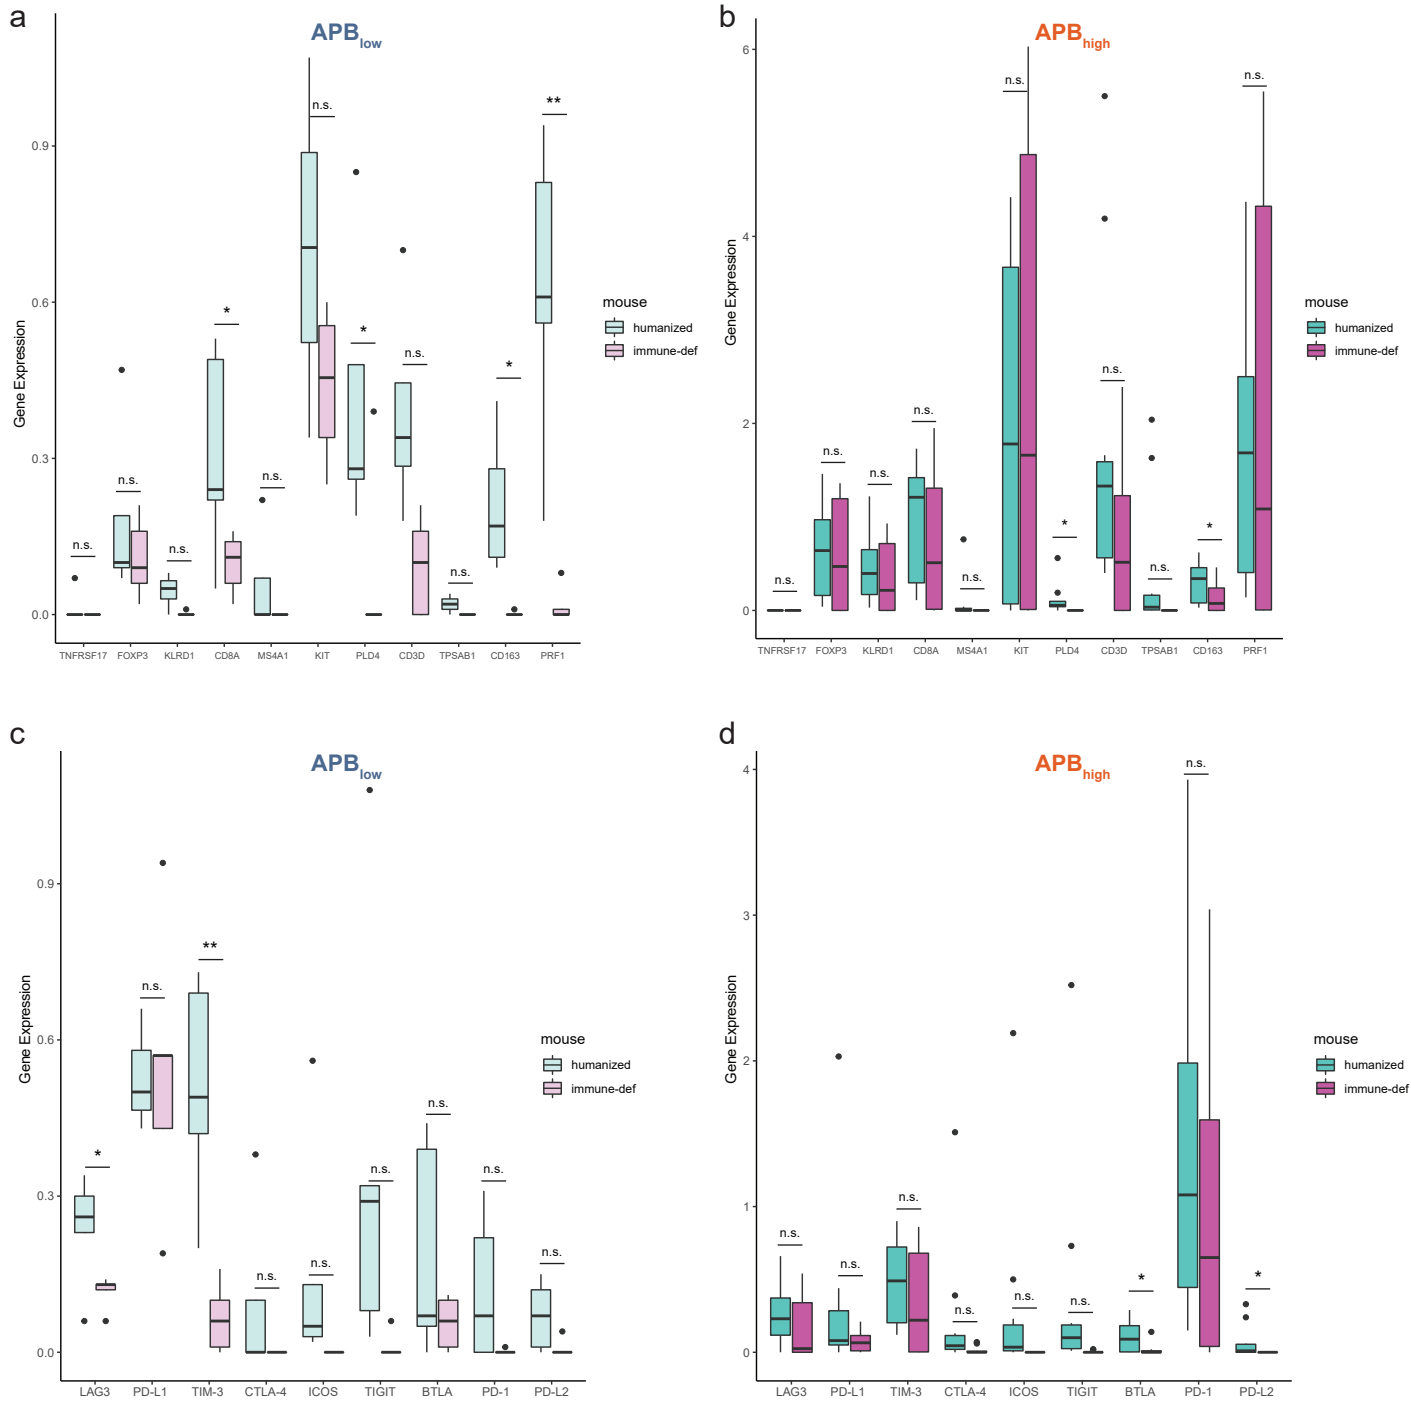

## Supplementary Figure 4

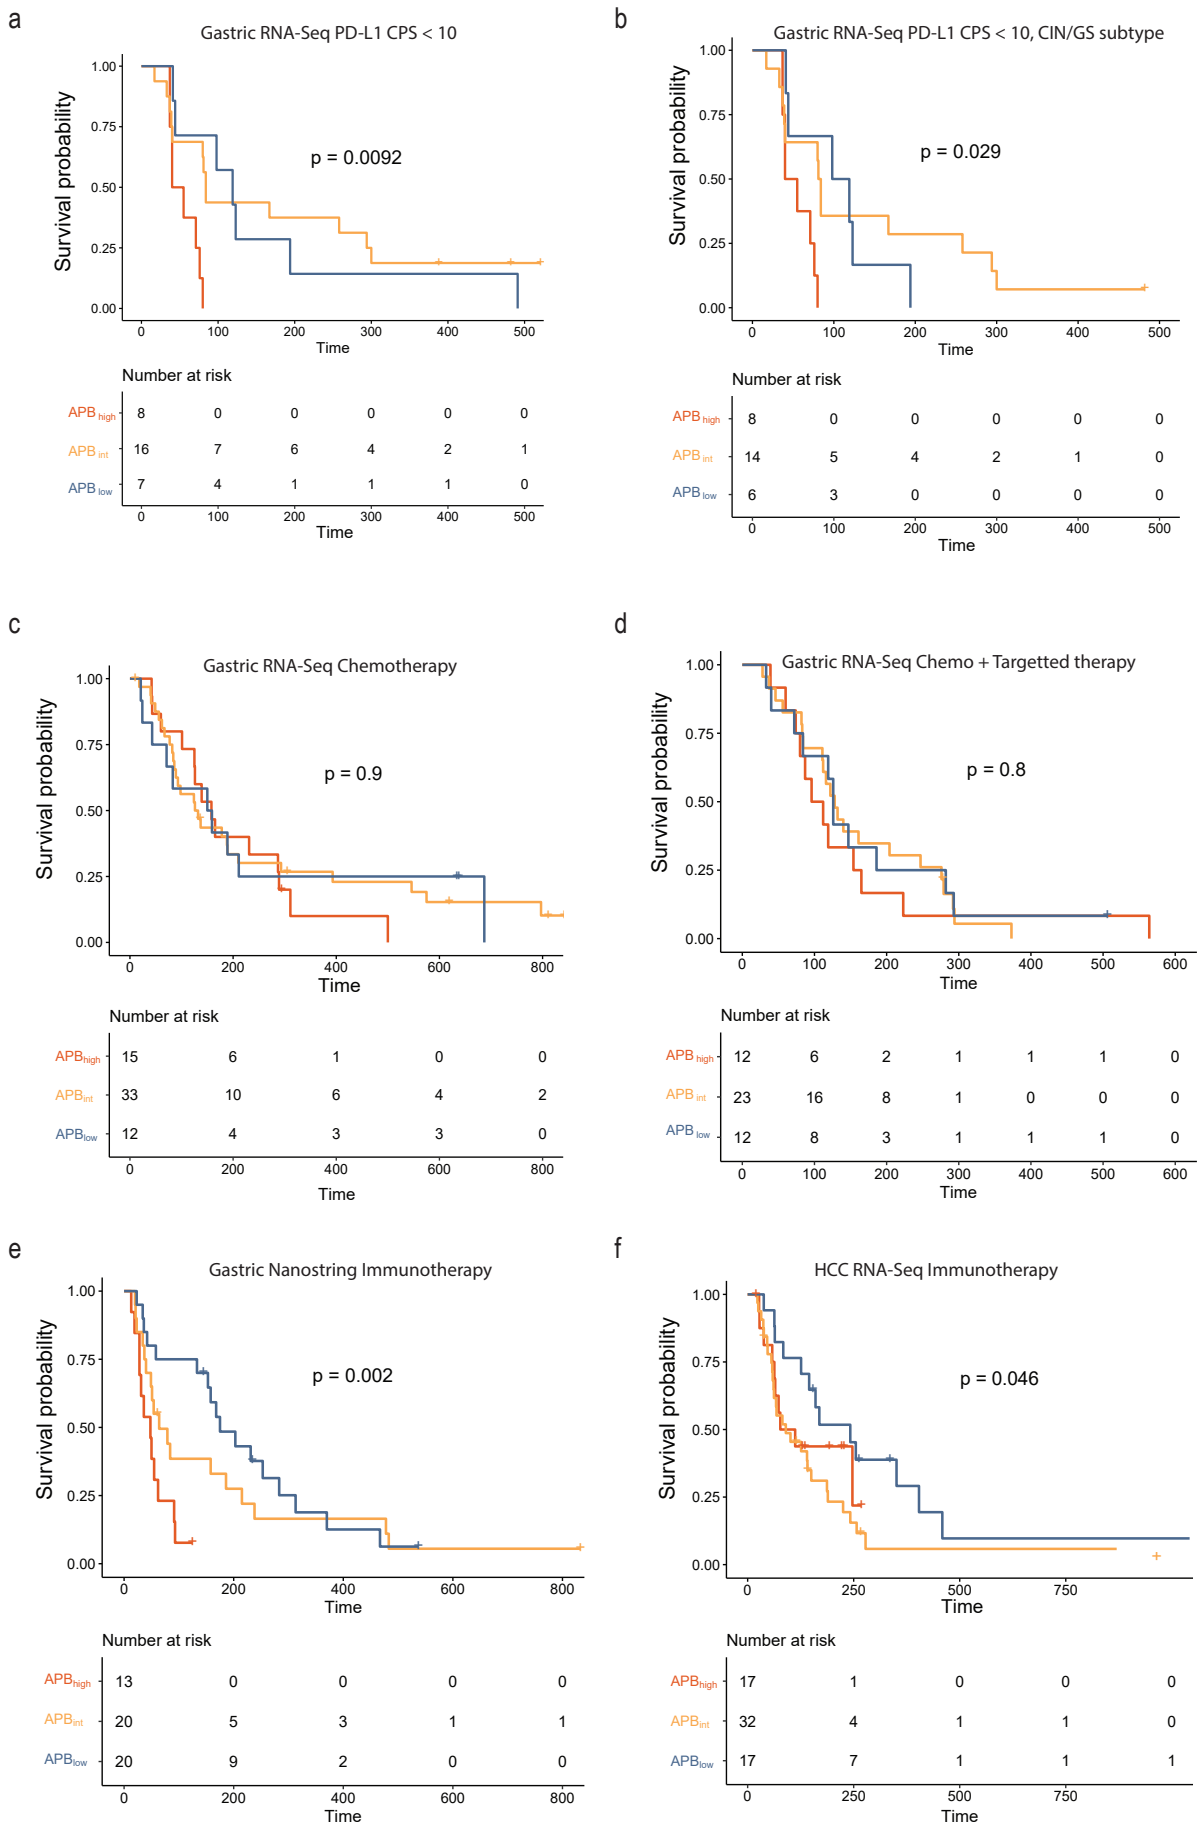

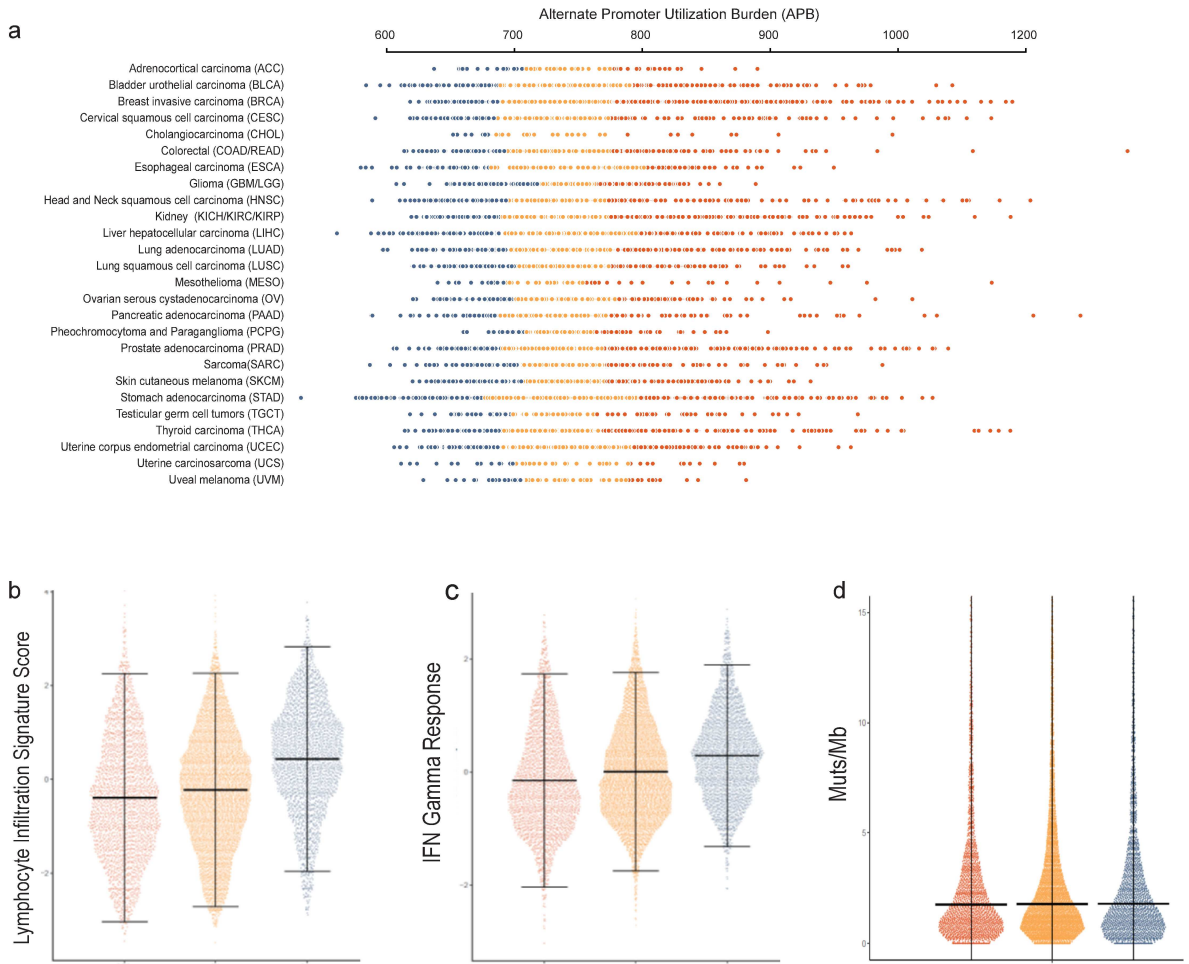

## Supplementary Figure Legends

### Supplementary Figure 1. APB in STAD

#### a. STAD Histological subtype by APB group

Distribution of STAD histological subtypes by APB group. Histological subtypes included: Diffuse, intestinal and others (mucinous, papillary, signet ring, tubular and not-otherwise-specified). There were no significant differences between APB groups when categorized by histological subtype.

#### b. APB and tumor mutational burden in STAD

Association of APB groups in STAD with tumor mutational burden (TMB). APB<sub>high</sub> group is denoted in red, APB<sub>int</sub> in yellow and APB<sub>low</sub> in blue. APB<sub>low</sub> tumors had a modestly higher median mutation rates compared to APB<sub>high</sub> tumors. However, this difference was largely driven by MSI tumors which were predominantly APB<sub>low</sub>

#### c. Correlation between APB and tumor purity

APB was correlated with tumor purity obtained from a consensus estimation method. There is a weak positive correlation between tumor content and APB (Pearson  $r = 0.09$ ,  $p = 0.062$ )

#### d-h. APB and correlation with immune cell types

APB groups were correlated with CD8 (d), follicular helper T cells (e), M1 macrophages (f), CD4 (g) and mast cells (h). APB<sub>low</sub> tumors had higher abundance of these cell types compared to APB<sub>high</sub> tumors, except for mast cells, where the converse was true. APB groups were also correlated with other cell types including B cells, dendritic cells, eosinophils, M2 macrophages, neutrophils, but no correlation was seen with APB groups (data not shown).

#### i. APB and correlation with intra-tumoral heterogeneity

APB groups correlated with intratumor heterogeneity scores calculated by ABSOLUTE. APB<sub>high</sub> tumors appeared to have higher intratumor heterogeneity than the APB<sub>low</sub> tumors ( $p = 0.022$ ).

**Supplementary Figure 2. scRNA-Seq in STAD by APB**

**a.** Expression of immune correlate genes used in bulk RNA-Seq analysis (*CD8A*, *GZMA*, *PRF1* and immune checkpoints *PD-1*, *PD-L1*, *PD-L2*, *CTLA4*, *LAG3*, *TIGIT*, *TIM3*, *ICOS*, *BTLA*) within specific cell types in scRNA-Seq. *CD8A*, *GZMA* and *PRF1* were expressed almost exclusively within T-cells (40 to 50% of T-cells) validating the expression of *CD8A*, *GZMA* and *PRF1* in bulk RNA-Seq as appropriate surrogates for T-cell cytolytic activity. Similarly, several checkpoints are expressed predominantly in T-cells (*PD-1*, *CTLA4*, *LAG3*, *TIGIT* and *ICOS*). *PD-L1* and *PD-L2* (ligands of PD-1) are expressed equally on several cell types such as epithelial cells, macrophages and fibroblasts.

**b.** Proportion of cellular subtypes (T-cells, B-cells, macrophages, epithelial cells, endothelial cells and fibroblasts) per APB group. Quantitative data of this graph are presented in **supplementary Table 3**.

**c.** Circle-violin plots of expression of *TIGIT* and *ICOS* by APB group in scRNA-Seq. The outer circle demonstrates the proportion of cells within the APB group which express the gene. Three comparisons are made: APB<sub>low</sub>(blue) vs. APB<sub>int</sub>(yellow); APB<sub>int</sub> vs. APB<sub>high</sub>(red) and APB<sub>low</sub> vs. APB<sub>high</sub>.

**Supplementary Figure 3. Gene expression of tumors in *in vivo* experiment**

**a.** Expression of genes marking specific cellular subtypes in APB<sub>low</sub> cell line.

Comparison made between humanized (green) and immune-deficient (pink) tumors. Levels of *CD8A* and *PRF1* (markers of cytolytic T-cells, adaptive immunity) and *PLD4* and *CD163* (markers of dendritic cells and macrophages respectively, innate immunity) were found to be higher in humanized mice compared to immune deficient mice. \* :  $p < 0.05$ , \*\* :  $p < 0.01$

**b.** Expression of genes marking specific cellular subtypes in APB<sub>high</sub> cell line.

Comparison made between humanized (dark green) and immune-deficient (dark pink) tumors. Only levels of *PLD4* and *CD163* (markers of dendritic cells and macrophages respectively, innate immunity) were found to be higher in humanized mice compared to immune deficient mice. \* :  $p < 0.05$

**c.** Expression of select immune checkpoints in APB<sub>low</sub> cell line. Comparison made between humanized (green) and immune-deficient (pink) tumors. Levels of *LAG3* and *TIM-3* were found to be higher in humanized mice compared to immune deficient mice. \* :  $p < 0.05$ , \*\* :  $p < 0.01$

**d.** Expression of select immune checkpoints in APB<sub>high</sub> cell line. Comparison made between humanized (green) and immune-deficient (pink) tumors.



**Supplementary Figure 4. Survival curves of APB in gastro-intestinal cancers**

- a. Kaplan–Meier plot of subgroup of gastric cancer samples treated with immunotherapy presented in **Figure 4A** and **B**, with PD-L1 CPS < 10 (n = 31)
- b. Kaplan–Meier plot of subgroup of gastric cancer samples treated with immunotherapy presented in **Figure 4A** and **B**, with PD-L1 CPS < 10 and CIN/GS subtype (n = 28)
- c. Kaplan–Meier plot of gastric cancer samples treated with chemotherapy (SOX or SP) (n = 60)
- d. Kaplan–Meier plot of gastric cancer samples treated with combination chemotherapy and targeted therapy (paclitaxel and ramucirumab) (n = 47)
- e. Kaplan–Meier plot of gastric cancer samples treated with immunotherapy, analysed by NanoString (n = 53)
- f. Kaplan–Meier plot of hepatocellular carcinoma samples treated with ICI (n = 66)

All Kaplan–Meier curves are of progression-free survival comparing APB<sub>high</sub> (red) vs. APB<sub>int</sub> (yellow) vs. APB<sub>low</sub> (blue). P value is according to two-sided log-rank test.

### **Supplementary Figure 5. Alternate promoter utilization burden – pan cancer analysis**

**a.** Alternate promoter utilization burden score across 26 tumor types. Within each tumor type, samples are divided into APB<sub>high</sub> (red, top quartile), APB<sub>int</sub> (yellow, middle quartiles) and APB<sub>low</sub> (blue, bottom quartile) of APB.

**b.** Lymphocyte infiltration signature score and correlation with APB group

Lymphocyte infiltration signature defined by Thorsson *et al.* dichotomized by APB groups. The APB<sub>low</sub> group has a statistically higher score compared to APB<sub>high</sub> (Wilcoxon test  $p < 0.0001$ )

**c.** IFN- $\gamma$  response signature and correlation with APB group

IFN- $\gamma$  response signature as defined by Thorsson *et al.* dichotomized by APB groups. The APB<sub>low</sub> group has a statistically higher score compared to APB<sub>high</sub> (Wilcoxon test  $p < 0.0001$ )

**d.** Correlation between APB groups and TMB in Pan-TCGA analysis

Association of APB groups in Pan-Cancer analysis of 7,919 samples with tumor mutational burden (TMB). APB<sub>high</sub> group is denoted in red, APB<sub>int</sub> in yellow and APB<sub>low</sub> in blue. There was no correlation between APB and TMB (median APB<sub>low</sub> 1.8 vs. APB<sub>int</sub> 1.8 vs. APB<sub>high</sub> 1.8 muts/Mb,  $p = 0.64$ )
